# Supplementary material
Source: publisher site journal article supplement (https://www.kjim.org/upload/media/kjim-2023-425-Supplementary-Table-1.pdf)
Supplement: Supplementary file 1 [file kjim-2023-425-Supplementary-Table-1.pdf]

**Supplementary Table 1. The schematic table for oral health score**

| Oral health-related variable       | Score |
|------------------------------------|-------|
| The number of dental caries        |       |
| 0                                  | 2     |
| 1-2                                | 1     |
| ≥ 3                                | 0     |
| The number of tooth brushing       |       |
| ≤ 1                                | 0     |
| 2                                  | 1     |
| ≥ 3                                | 2     |
| The use of secondary oral products |       |
| No                                 | 0     |
| Yes                                | 1     |
| Regular dental examination         |       |
| No                                 | 0     |
| Yes                                | 1     |
| Oral health score                  |       |
| Total                              | 6     |
